# Supplementary material
Source: PubMed Central journal article supplement (PMC3983474)

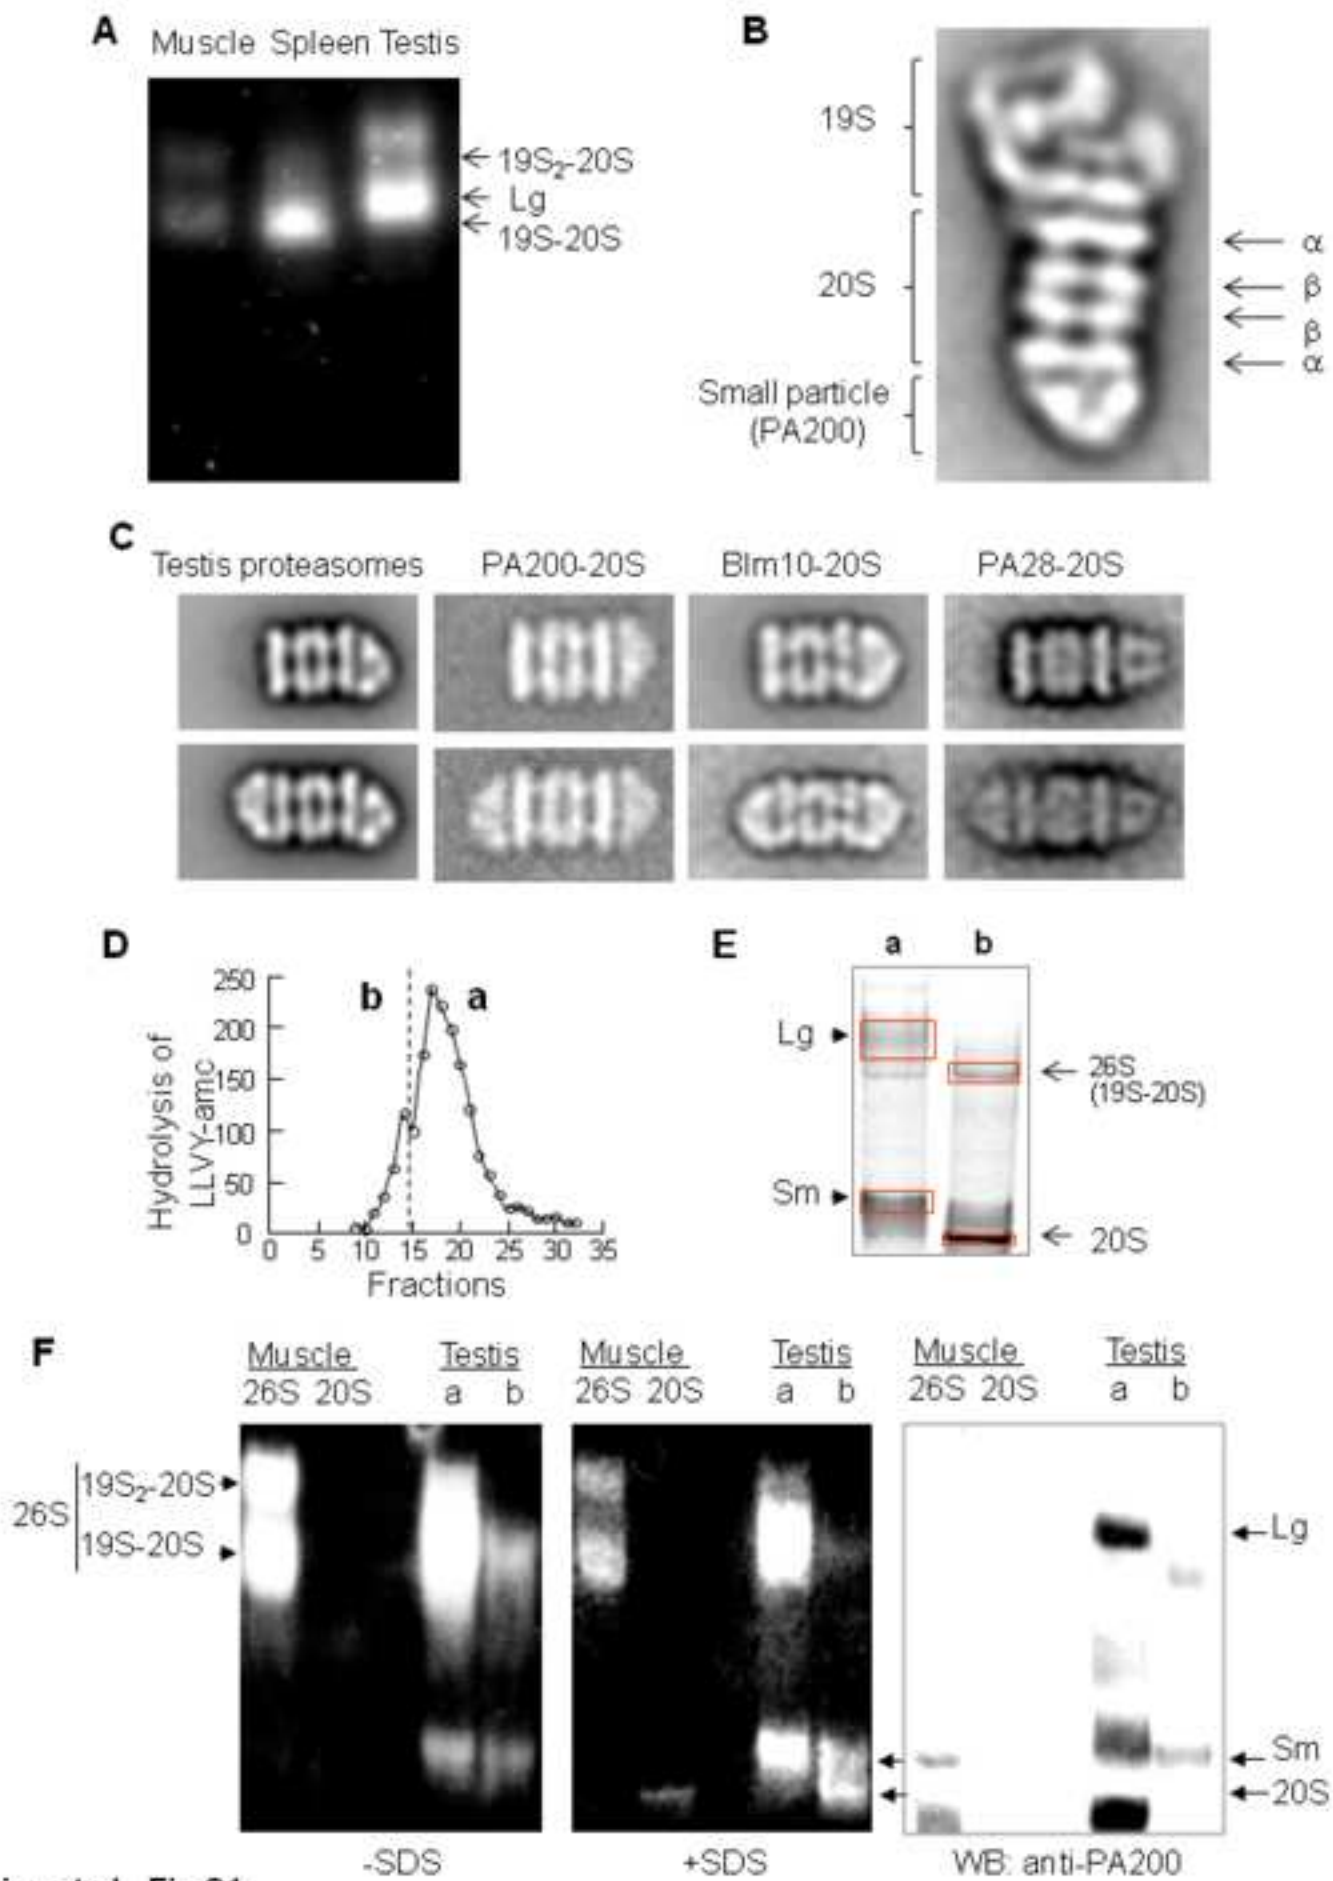

**A**

$\alpha$ 4s 1 MASRYDRAITVFSPDGHLPQVEYAQEAVKKGSTAVGIRGTNIVVLGVEKKSVAKLQDERTYRKICALDDHVCMAFAVLTIFIGLTADARY  
 $\alpha$ 4 1 MS--YDRAITVFSPDGHLPQVEYAQEAVKKGSTAVGVVGRDIYVLGVEKKSVAKLQDERTYRKICALDDNVCMFAFA-----GLTADARI  
 \*; \*\*\*\*\*; \*\* ; \*\*\*\*\*; \*\*\*\*\*  
  
 $\alpha$ 4s VINRARVEQCQSHKLTVEDPVTVEYI TRFIATLKQKYTQSNRRPFGISALIVGFDGDISRLYQDTPSGTYHAWKANAIGRSAKTVREFL  
 $\alpha$ 4 VINRARVEQCQSHRLTVEDPVTVEYI TRYIASLKQRYTQSNRRPFGISALIVGFDFDGTFRLYQDTPSGTYHAWKANAI GRGAKSVREFL  
 \*\*\*\*\*; \*\*\*\*\*; \*\*; \*\*; \*\*\*\*\* \*\* , \*\*\*\*\*; \*\*; \*\*\*\*\*  
  
 $\alpha$ 4s EKNYTDAIASDSEAIKLAIKALLEVVQSGGKNIELAIIRRNQPLKMFSAKVELYVTEIEKEKEEAEEKKSKKKS 256  
 $\alpha$ 4 EKNYTDEAIETDDLTIKLVIKALLEVVQSGGKNIELAVMRRDQSLKILNPEEIEKYVVAEIEKEKEENEKSKKQKAS 246  
 \*\*\*\*\*; \*\* ;\* , \*\*; \*\*\*\*\*; \*\*; \*; ..; \*; \* \*\*; \*\*\*\*\* \*\*; \*\*;

**B**
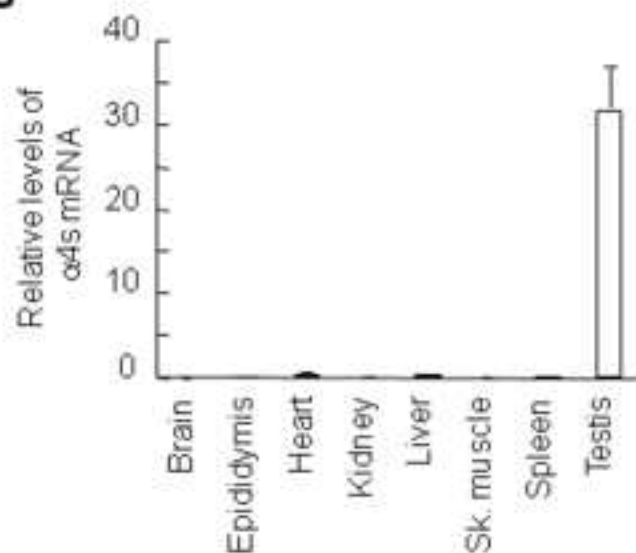
**C**
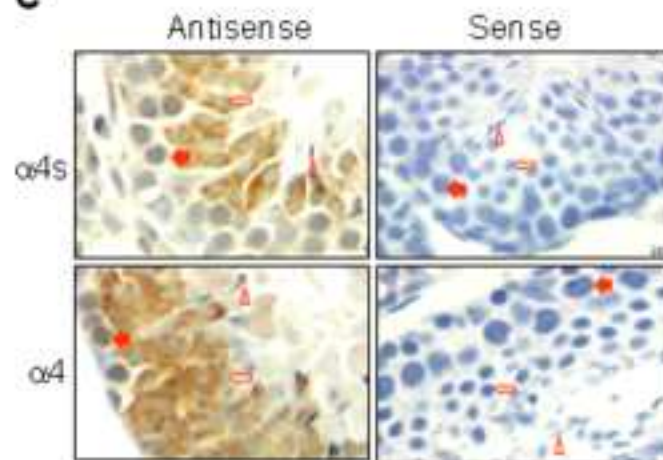
**D**
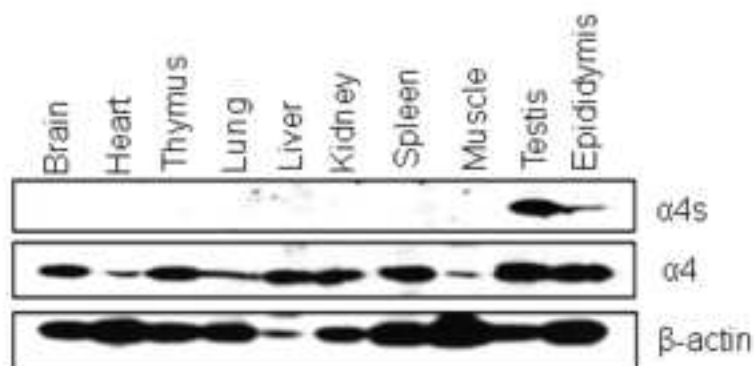

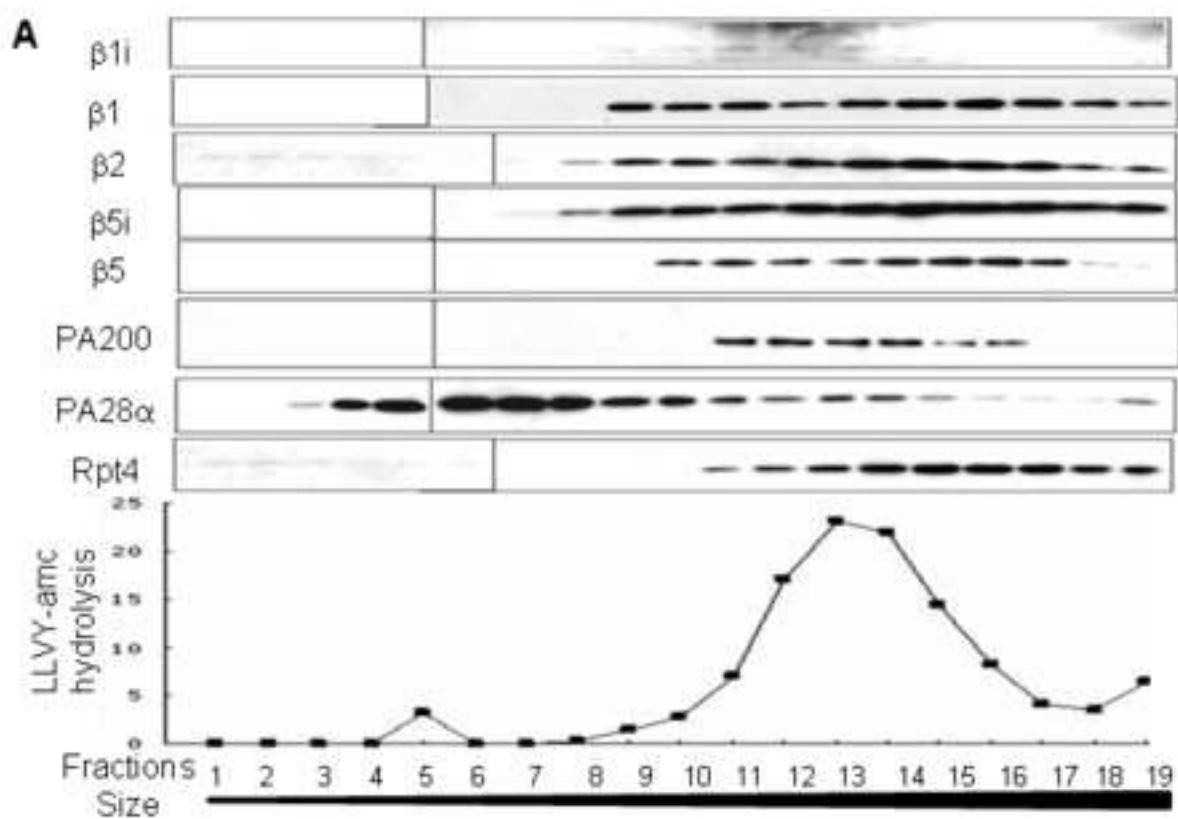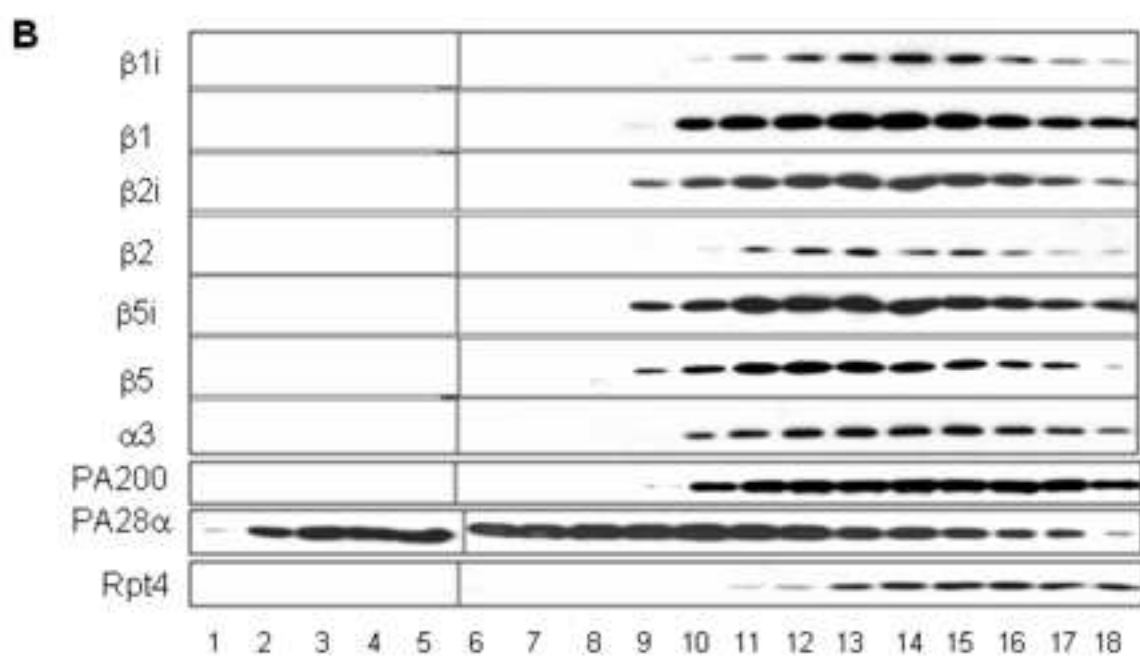

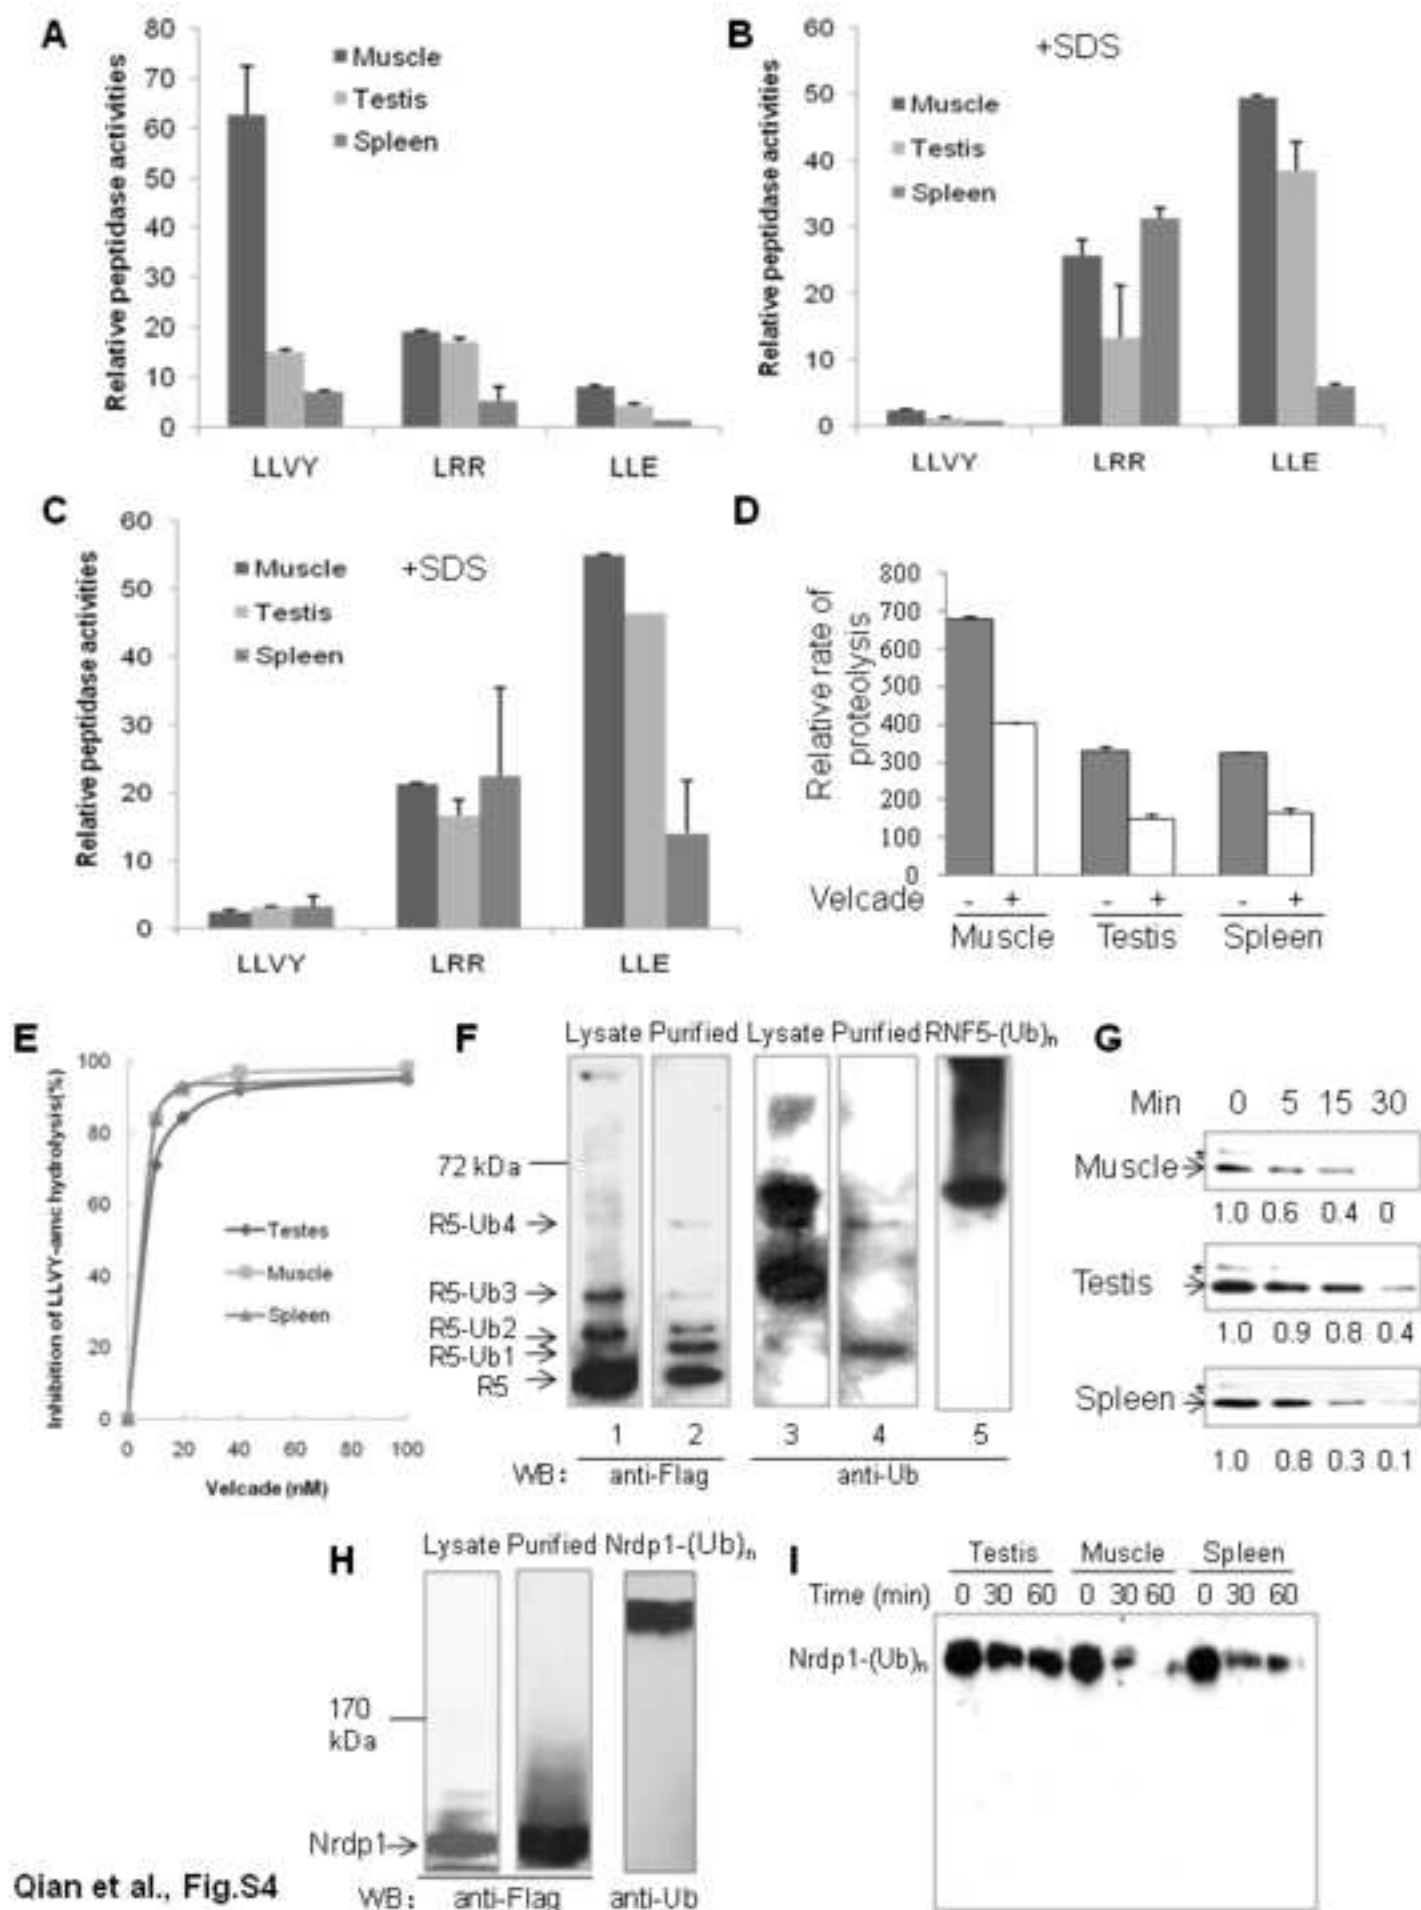

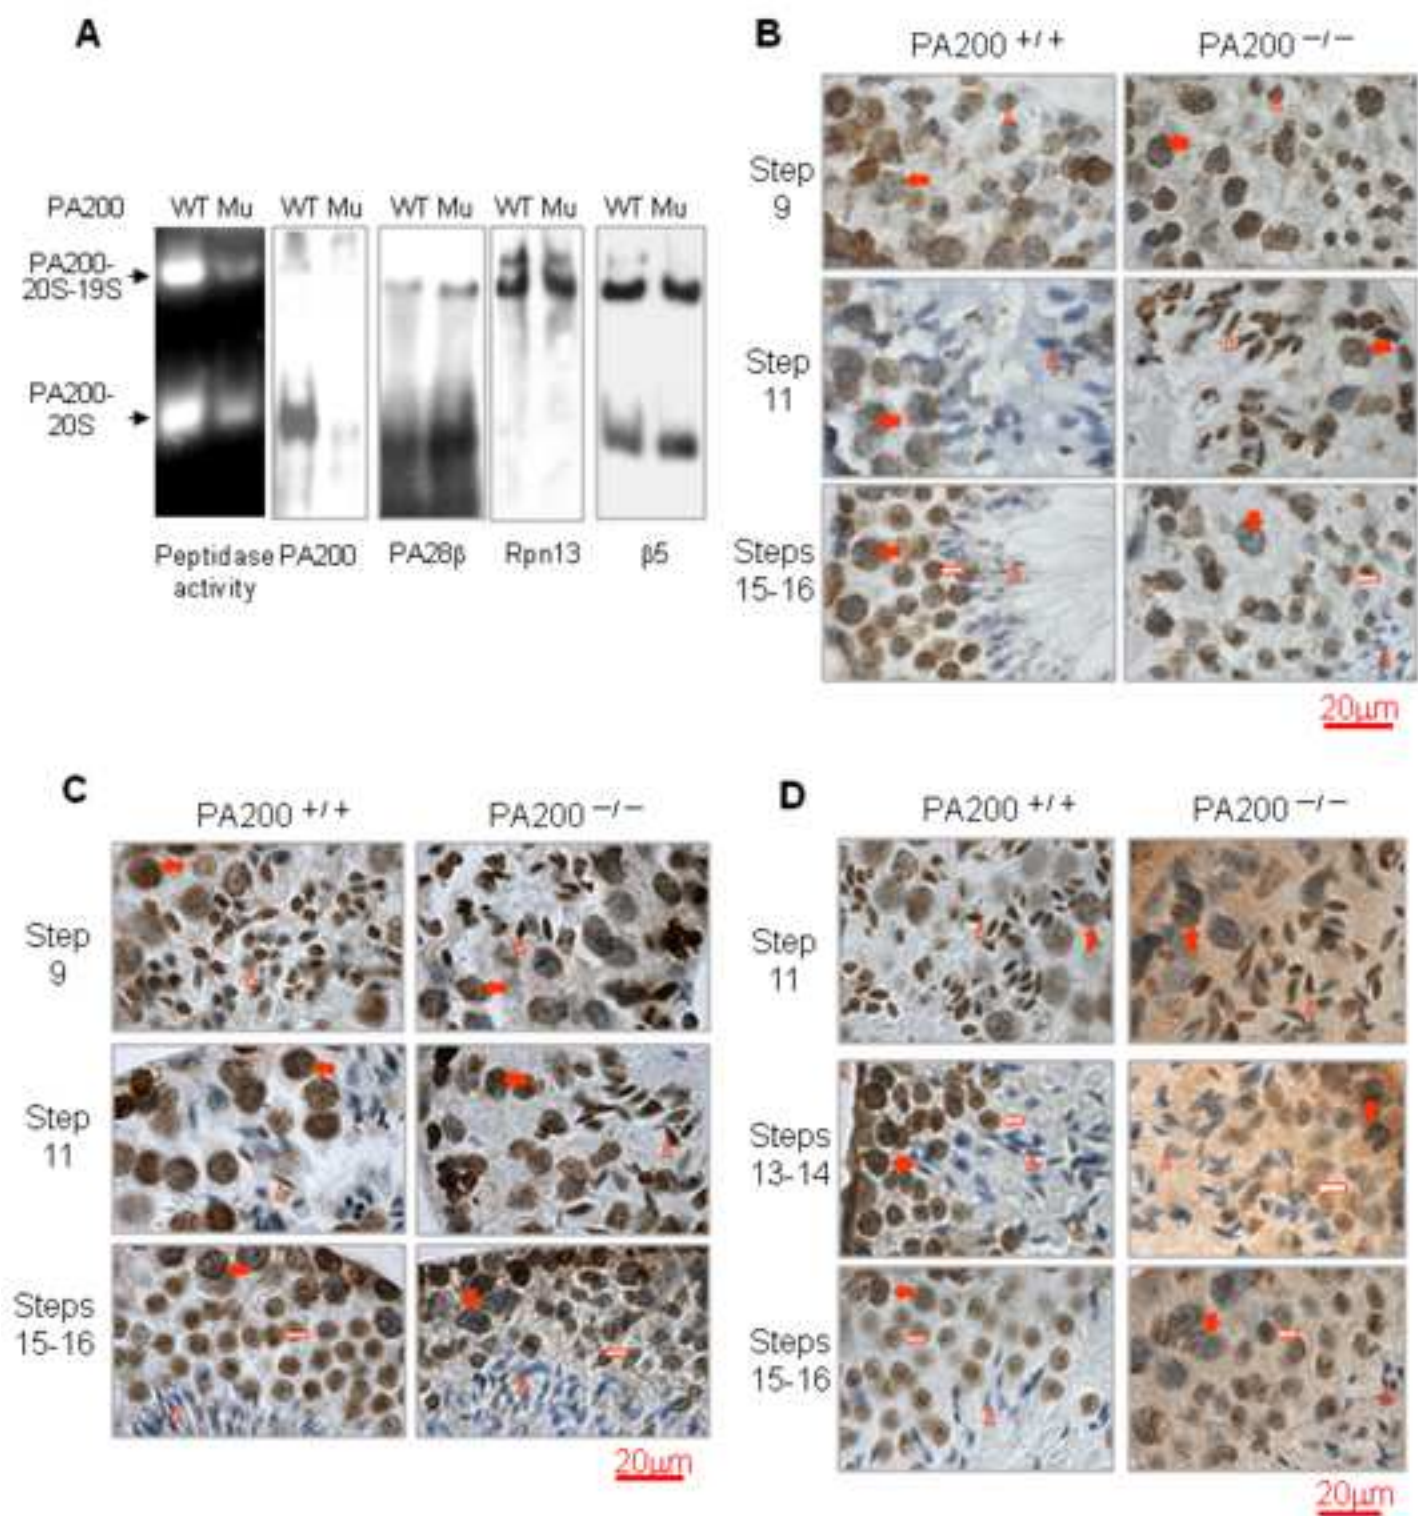

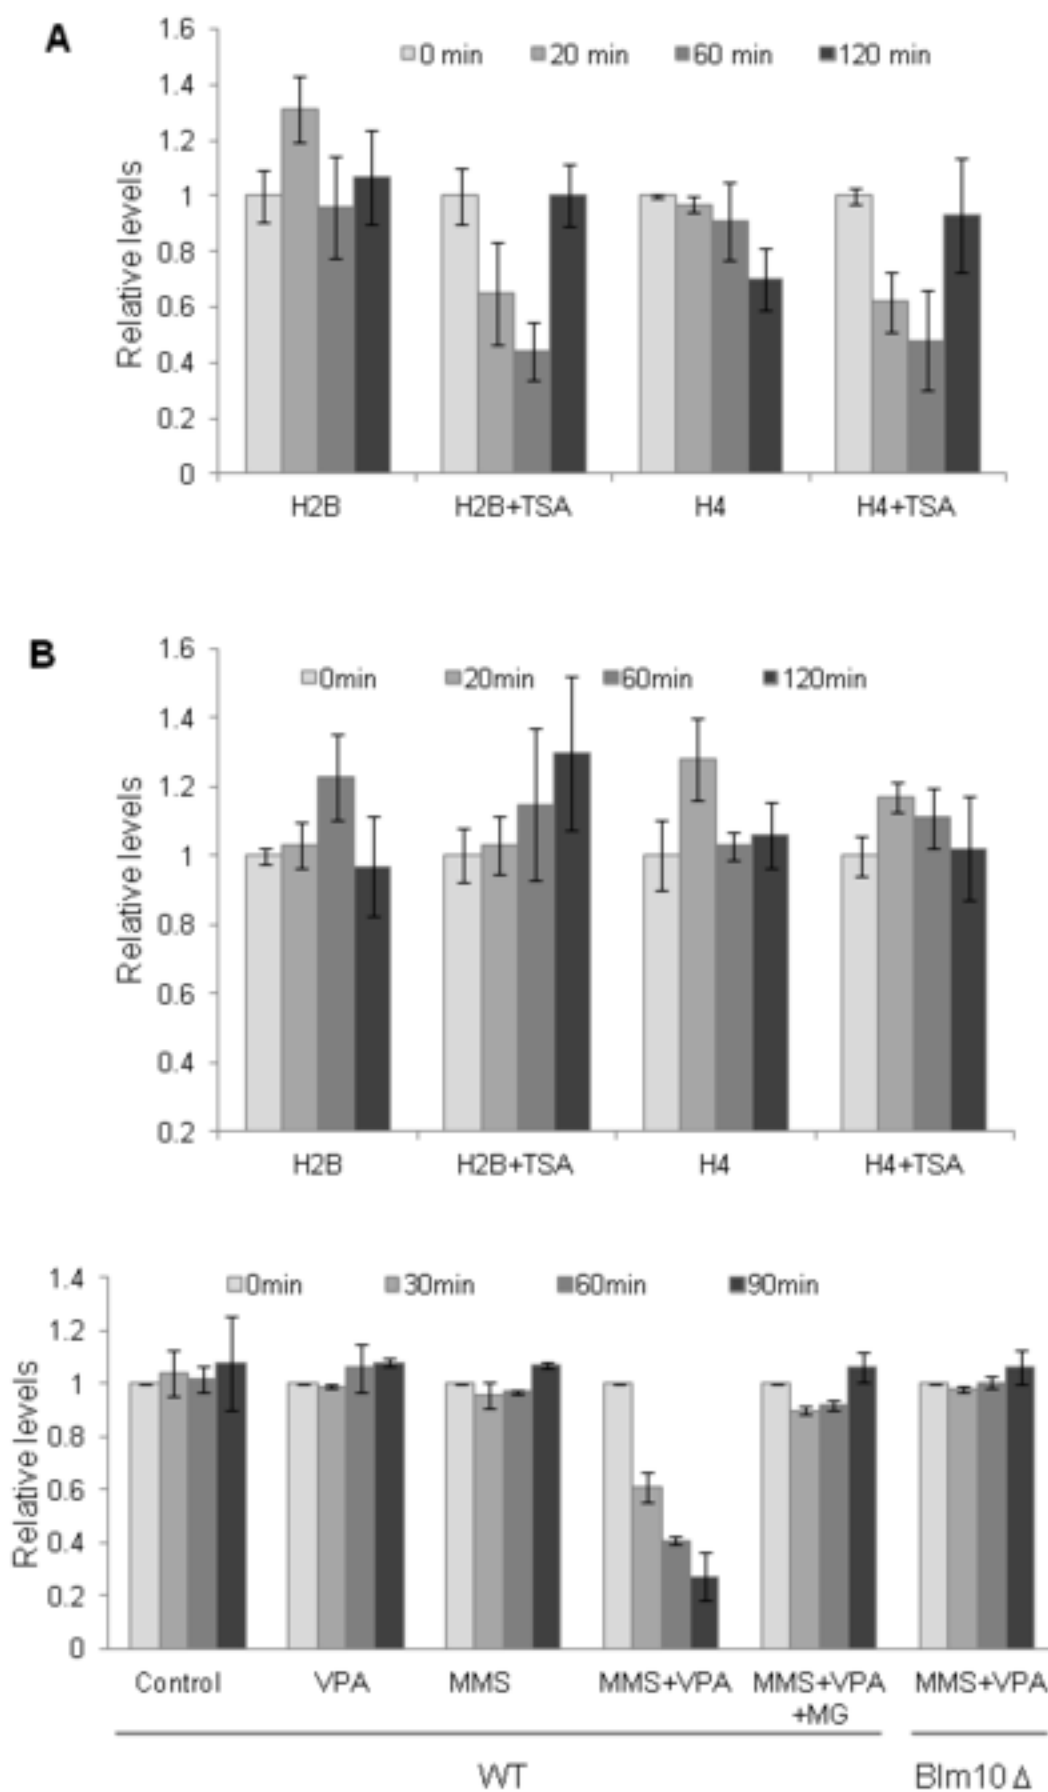

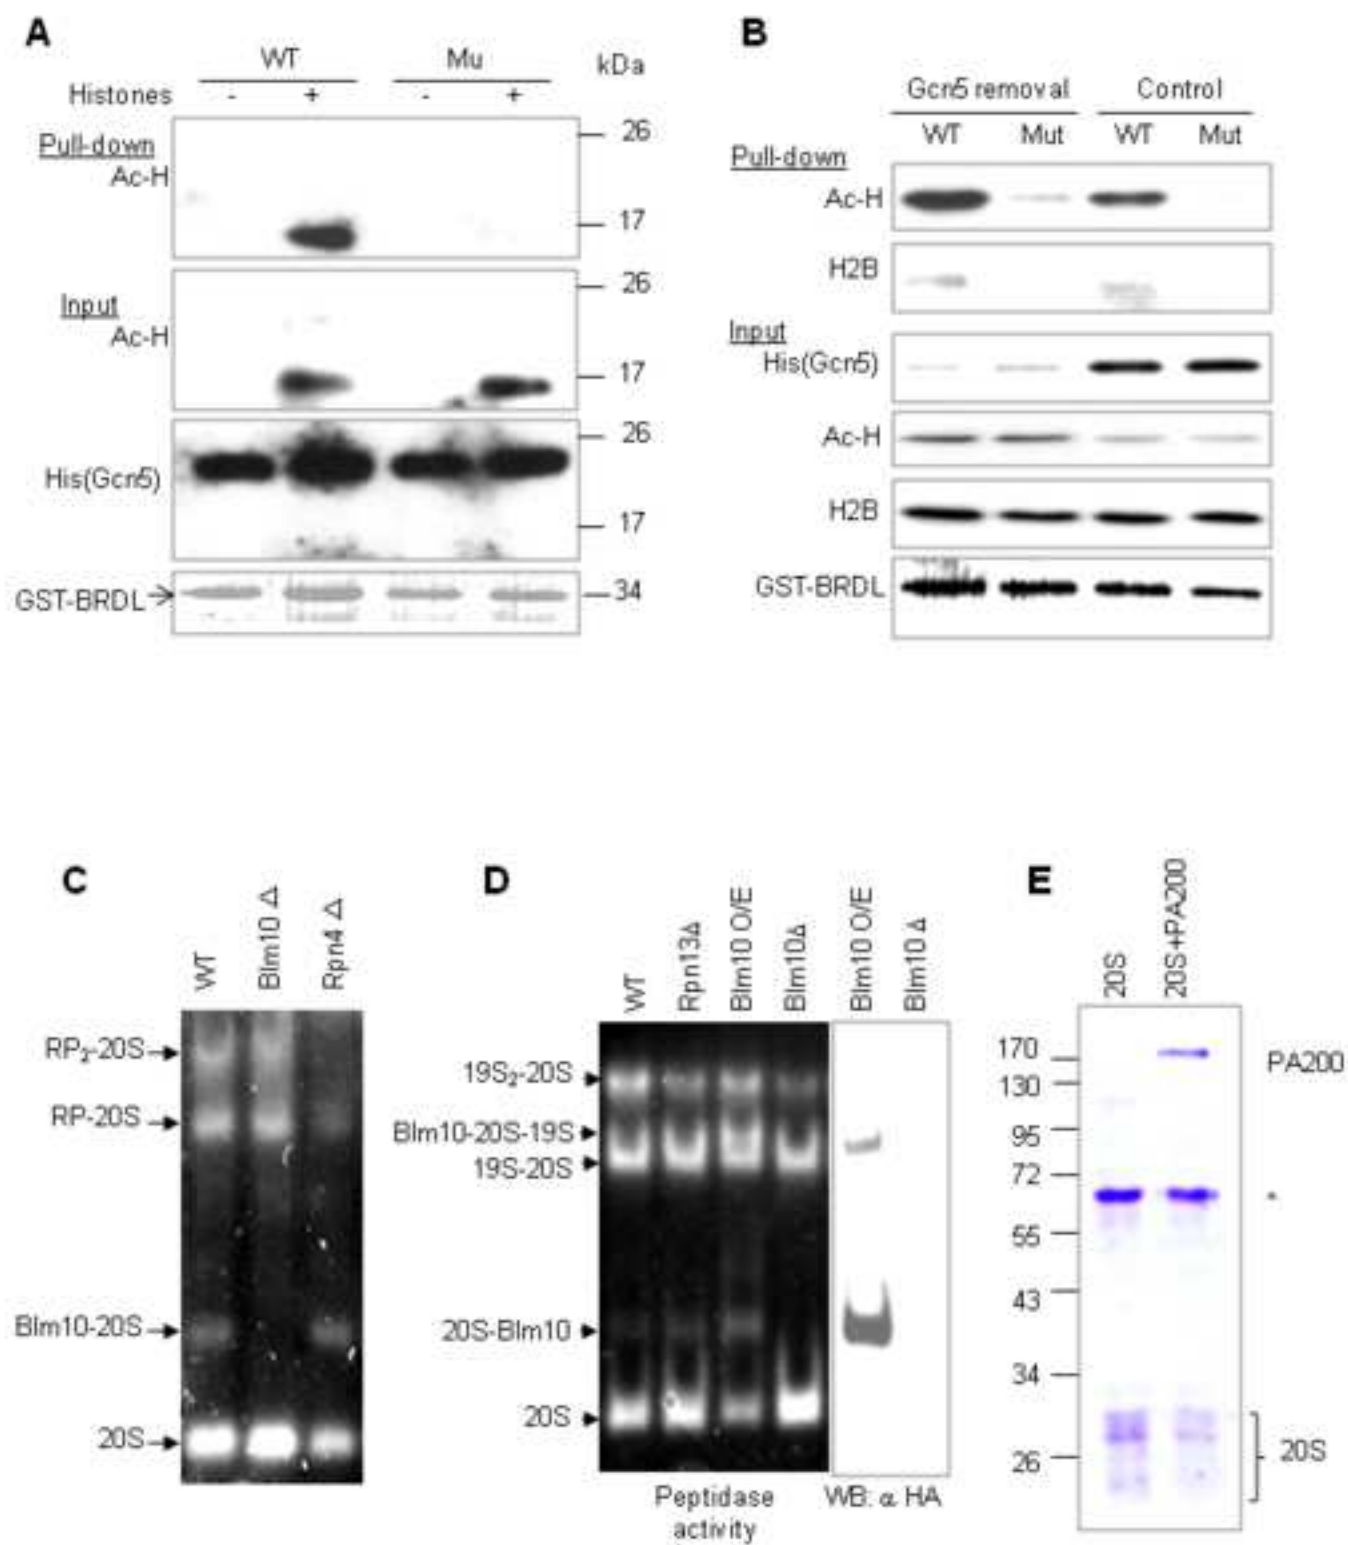

Supplement: NIHMS472590-supplement-02.pdf [file NIHMS472590-supplement-02.pdf]
